# Supplementary material
Source: publisher site journal article supplement (https://www.dovepress.com/article/190354)
Supplement: Supplementary file 1 [file get_supplementary_file.php]

# TECHNICAL DATA SHEET

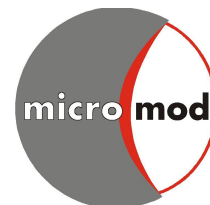

## micromod Partikeltechnologie GmbH

Friedrich-Barnewitz-Str. 4  
D-18119 Rostock  
Germany

Telephone: + 49 381 / 54 34 56 10  
Fax: + 49 381 / 54 34 56 20  
E-mail address: [info@micromod.de](mailto:info@micromod.de)

|                                  |                                                                                                                          |
|----------------------------------|--------------------------------------------------------------------------------------------------------------------------|
| <b>Product code:</b>             | 79-00-201                                                                                                                |
| <b>Product name:</b>             | nanomag®-D-spio                                                                                                          |
| <b>Surface:</b>                  | plain                                                                                                                    |
| <b>Size:</b>                     | 20 nm                                                                                                                    |
| <b>Solid content:</b>            | 25 mg/ml                                                                                                                 |
| <b>Composition:</b>              | dextran iron oxide composite particles                                                                                   |
| <b>Polydispersity index:</b>     | < 0.2                                                                                                                    |
| <b>Shape:</b>                    | cluster-typed                                                                                                            |
| <b>Density:</b>                  | 1.4 g/ccm                                                                                                                |
| <b>Iron concentration:</b>       | 2.4 mg/ml                                                                                                                |
| <b>Magnetization:</b>            | 54 emu/g iron (H =1000 Oe)                                                                                               |
| <b>Saturation magnetization:</b> | >69 emu/g iron (H > 10.000 Oe)                                                                                           |
| <b>Coercive field Hc:</b>        | 0.049 kA/m                                                                                                               |
| <b>Stable in:</b>                | aqueous buffers pH > 4                                                                                                   |
| <b>Not stable in:</b>            | organic solvents, acidic solutions pH < 4                                                                                |
| <b>Product form:</b>             | suspension in water                                                                                                      |
| <b>Particles per ml:</b>         | 1.6*10E15                                                                                                                |
| <b>Particles per mg:</b>         | 1.6*10E14                                                                                                                |
| <b>Colour:</b>                   | dark brown                                                                                                               |
| <b>Additional remarks:</b>       | Storage at 2 - 8°C for 6 months                                                                                          |
| <b>TECHNOTES:</b>                | The mean hydrodynamic particle diameter may vary in the range of 20-100 nm (Z-Average, photon correlation spectroscopy). |

# TECHNICAL DATA SHEET



## micromod Partikeltechnologie GmbH

Friedrich-Barnewitz-Str. 4  
D-18119 Rostock  
Germany

Telephone: + 49 381 / 54 34 56 10  
Fax: + 49 381 / 54 34 56 20  
E-mail address: [info@micromod.de](mailto:info@micromod.de)

---

|                                      |                                                                                                                          |
|--------------------------------------|--------------------------------------------------------------------------------------------------------------------------|
| <b>Product code:</b>                 | 79-01-201                                                                                                                |
| <b>Product name:</b>                 | nanomag®-D-spio                                                                                                          |
| <b>Surface:</b>                      | NH <sub>2</sub>                                                                                                          |
| <b>Size:</b>                         | 20 nm                                                                                                                    |
| <b>Solid content:</b>                | 5 mg/ml                                                                                                                  |
| <b>Composition:</b>                  | dextran iron oxide composite particles                                                                                   |
| <b>Polydispersity index:</b>         | < 0.2                                                                                                                    |
| <b>Shape:</b>                        | cluster-typed                                                                                                            |
| <b>Density:</b>                      | 1.4 g/ccm                                                                                                                |
| <b>Iron concentration:</b>           | 2.4 mg/ml                                                                                                                |
| <b>Magnetization:</b>                | 54 emu/g iron (H =1000 Oe)                                                                                               |
| <b>Saturation magnetization:</b>     | >69 emu/g iron (H > 10.000 Oe)                                                                                           |
| <b>Coercive field H<sub>c</sub>:</b> | 0.049 kA/m                                                                                                               |
| <b>Stable in:</b>                    | aqueous buffers pH > 4                                                                                                   |
| <b>Not stable in:</b>                | organic solvents, acidic solutions pH < 4                                                                                |
| <b>Product form:</b>                 | suspension in water                                                                                                      |
| <b>Particles per ml:</b>             | 8.0*10E14                                                                                                                |
| <b>Particles per mg:</b>             | 1.6*10E14                                                                                                                |
| <b>Surface charge density:</b>       | 3 µmol/ g iron                                                                                                           |
| <b>Colour:</b>                       | dark brown                                                                                                               |
| <b>Additional remarks:</b>           | Storage at 2 - 8°C for 6 months                                                                                          |
| <b>TECHNOTES:</b>                    | The mean hydrodynamic particle diameter may vary in the range of 20-110 nm (Z-Average, photon correlation spectroscopy). |

# TECHNICAL DATA SHEET

## micromod Partikeltechnologie GmbH

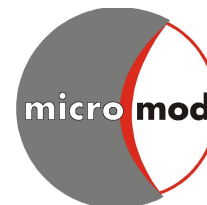

Friedrich-Barnewitz-Str. 4  
D-18119 Rostock  
Germany

Telephone: + 49 381 / 54 34 56 10  
Fax: + 49 381 / 54 34 56 20  
E-mail address: [info@micromod.de](mailto:info@micromod.de)

---

|                                  |                                                                                                                          |
|----------------------------------|--------------------------------------------------------------------------------------------------------------------------|
| <b>Product code:</b>             | 79-02-201                                                                                                                |
| <b>Product name:</b>             | nanomag®-D-spio                                                                                                          |
| <b>Surface:</b>                  | COOH                                                                                                                     |
| <b>Size:</b>                     | 20 nm                                                                                                                    |
| <b>Solid content:</b>            | 5 mg/ml                                                                                                                  |
| <b>Composition:</b>              | dextran iron oxide composite particles                                                                                   |
| <b>Polydispersity index:</b>     | < 0.2                                                                                                                    |
| <b>Shape:</b>                    | cluster-typed                                                                                                            |
| <b>Density:</b>                  | 1.4 g/ccm                                                                                                                |
| <b>Iron concentration:</b>       | 2.4 mg/ml                                                                                                                |
| <b>Magnetization:</b>            | 54 emu/g iron (H =1000 Oe)                                                                                               |
| <b>Saturation magnetization:</b> | >69 emu/g iron (H > 10.000 Oe)                                                                                           |
| <b>Coercive field Hc:</b>        | 0.049 kA/m                                                                                                               |
| <b>Stable in:</b>                | aqueous buffers pH > 4                                                                                                   |
| <b>Not stable in:</b>            | organic solvents, acidic solutions pH < 4                                                                                |
| <b>Product form:</b>             | suspension in water                                                                                                      |
| <b>Particles per ml:</b>         | 8.0*10E14                                                                                                                |
| <b>Particles per mg:</b>         | 1.6*10E14                                                                                                                |
| <b>Surface charge density:</b>   | 3 µmol/ g iron                                                                                                           |
| <b>Protein binding capacity:</b> | 1.5 µg albumin (BSA) / mg particle (1 molecule albumin per particle)                                                     |
| <b>Colour:</b>                   | dark brown                                                                                                               |
| <b>Additional remarks:</b>       | Storage at 2 - 8°C for 6 months                                                                                          |
| <b>TECHNOTES:</b>                | The mean hydrodynamic particle diameter may vary in the range of 50-110 nm (Z-Average, photon correlation spectroscopy). |
